# Supplementary material for: Synthesis, Characterization, and Antiproliferative Activity of Novel Chiral [QuinoxP*AuCl2]+ Complexes
Source: MDPI journal article supplement (doi:10.3390/molecules25235735), 2020-12-04
Supplement: s1 [file s1]

## Supporting Information for

# Synthesis, Characterization and Antiproliferative Activity of Novel Chiral [QuinoxP\*AuCl<sub>2</sub>]<sup>+</sup> Complexes

Adedamola S. Arojojoye,<sup>a</sup> R. Tyler Mertens,<sup>a</sup> Samuel Ofori,<sup>a</sup> Sean Parkin,<sup>a</sup> and Samuel G. Awuah<sup>a,b\*</sup>

<sup>a</sup>Department of Chemistry, University of Kentucky, Lexington, Kentucky 40506

<sup>b</sup>Department of Pharmaceutical Sciences, College of Pharmacy, University of Kentucky, Lexington, Kentucky 40536

\*awuah@uky.edu

| Table of contents    | Page |
|----------------------|------|
| NMR Spectra          | S2   |
| HRMS Spectra         | S8   |
| HPLC Spectra         | S12  |
| Electrochemistry     | S13  |
| X-ray Accession Code | S13  |

# NMR Spectra:

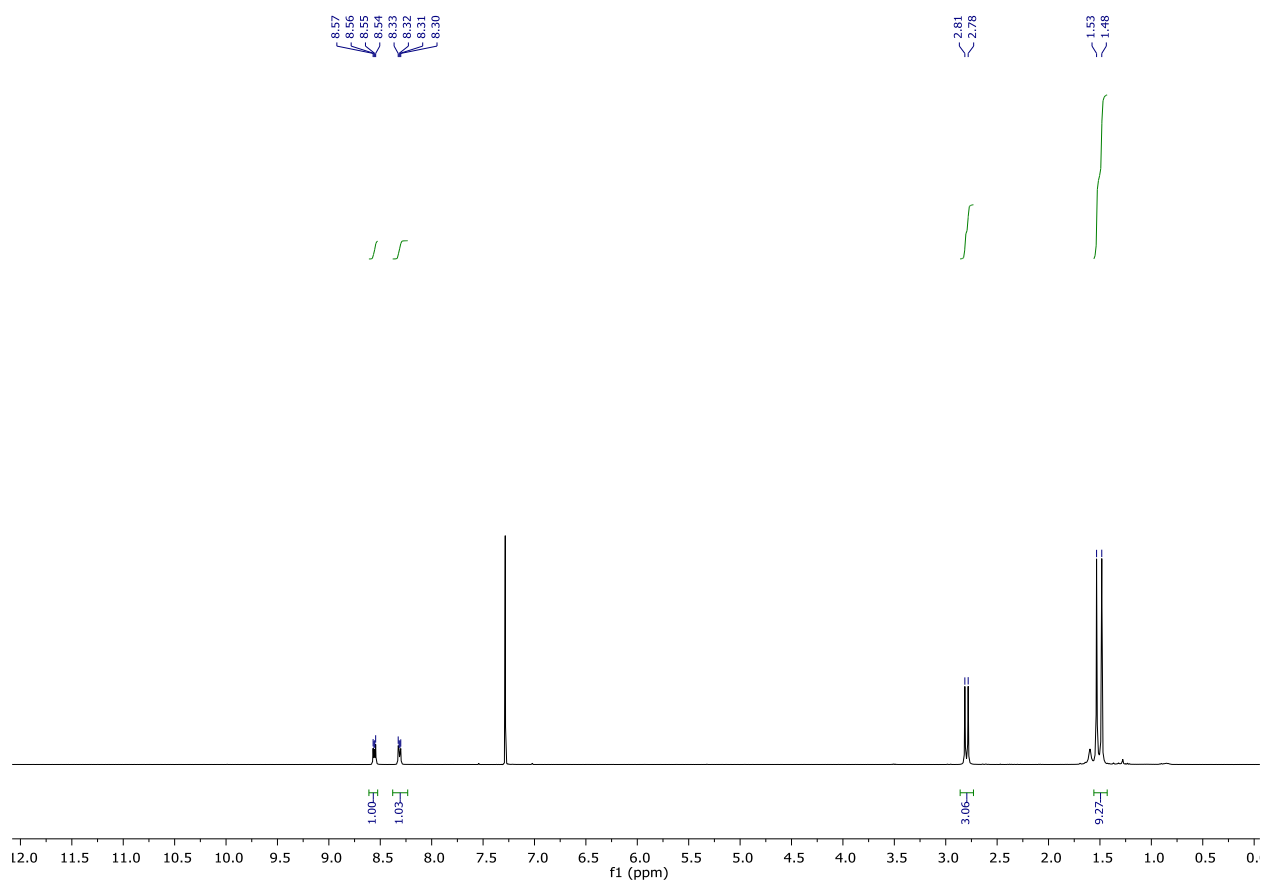

**Figure S1.**  $^1\text{H}$  NMR spectrum of **1** in  $\text{CDCl}_3$  at 298K.

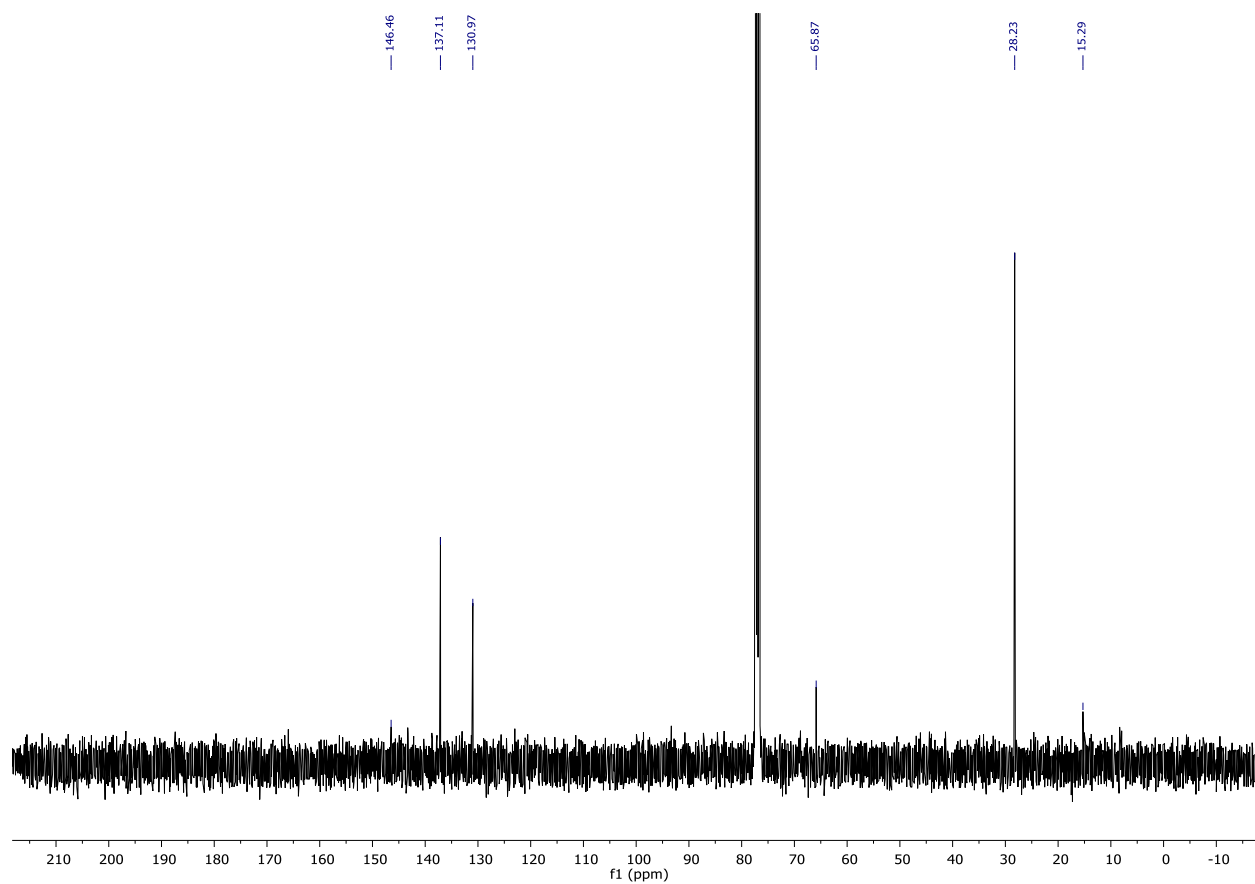

**Figure S2.**  $^{13}\text{C}$  NMR spectrum of **1** in  $\text{CDCl}_3$  at 298K.

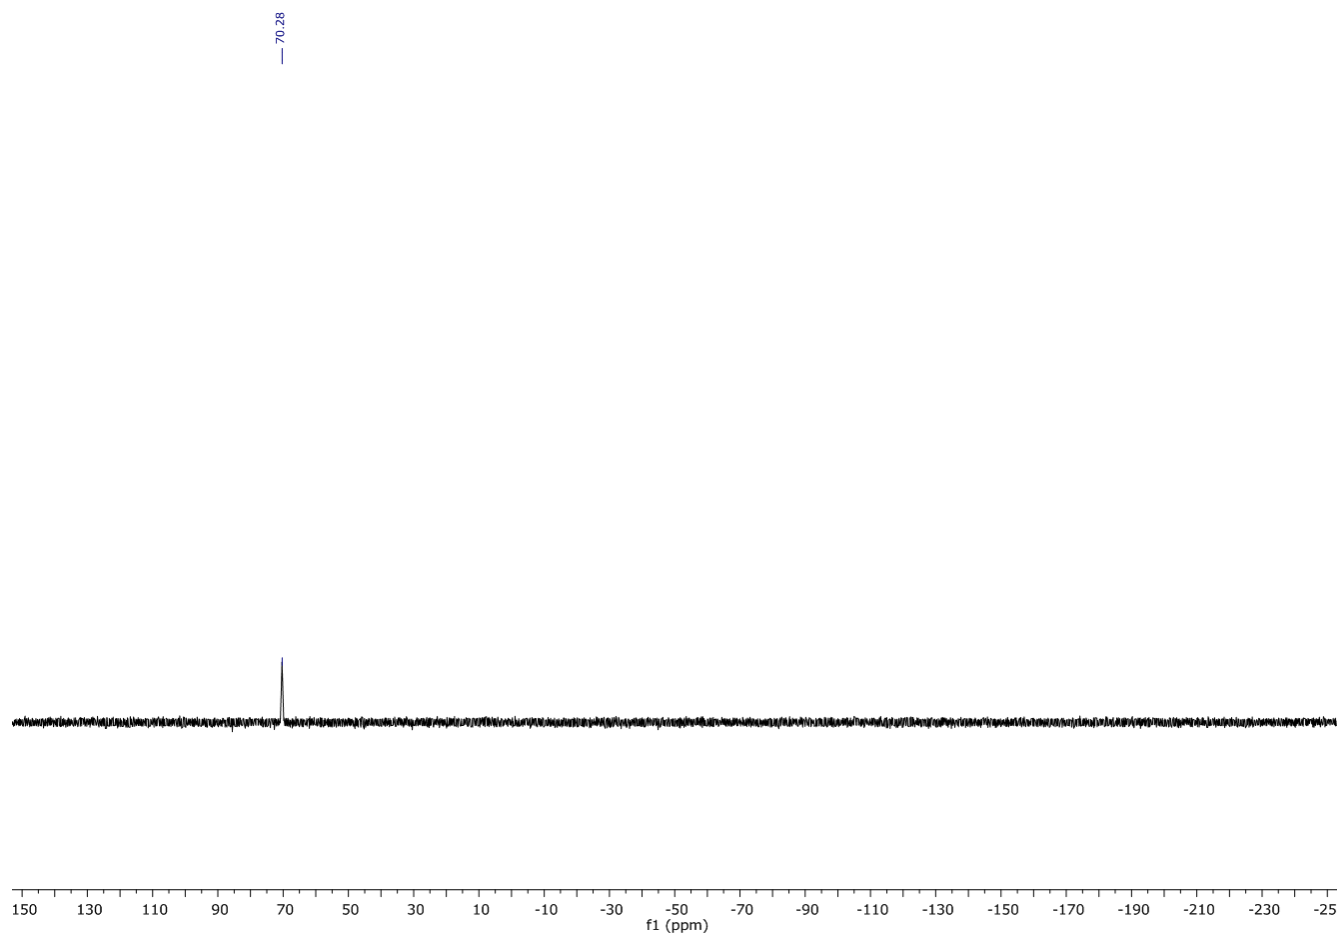

**Figure S3.**  $^{31}\text{P}$  NMR spectrum of **1** in  $\text{CDCl}_3$  at 298K.

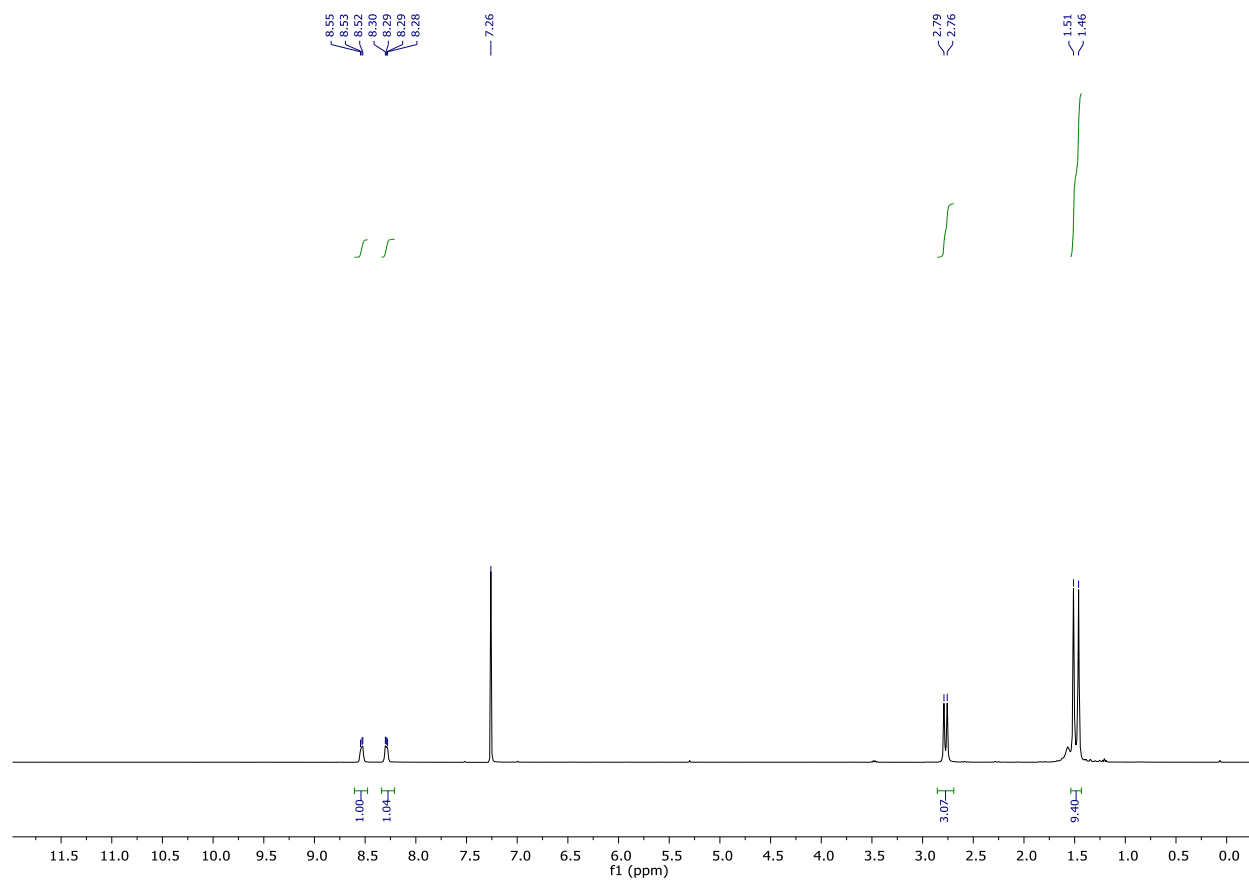

**Figure S4.** <sup>1</sup>H NMR spectrum of **2** in CDCl<sub>3</sub> at 298K.

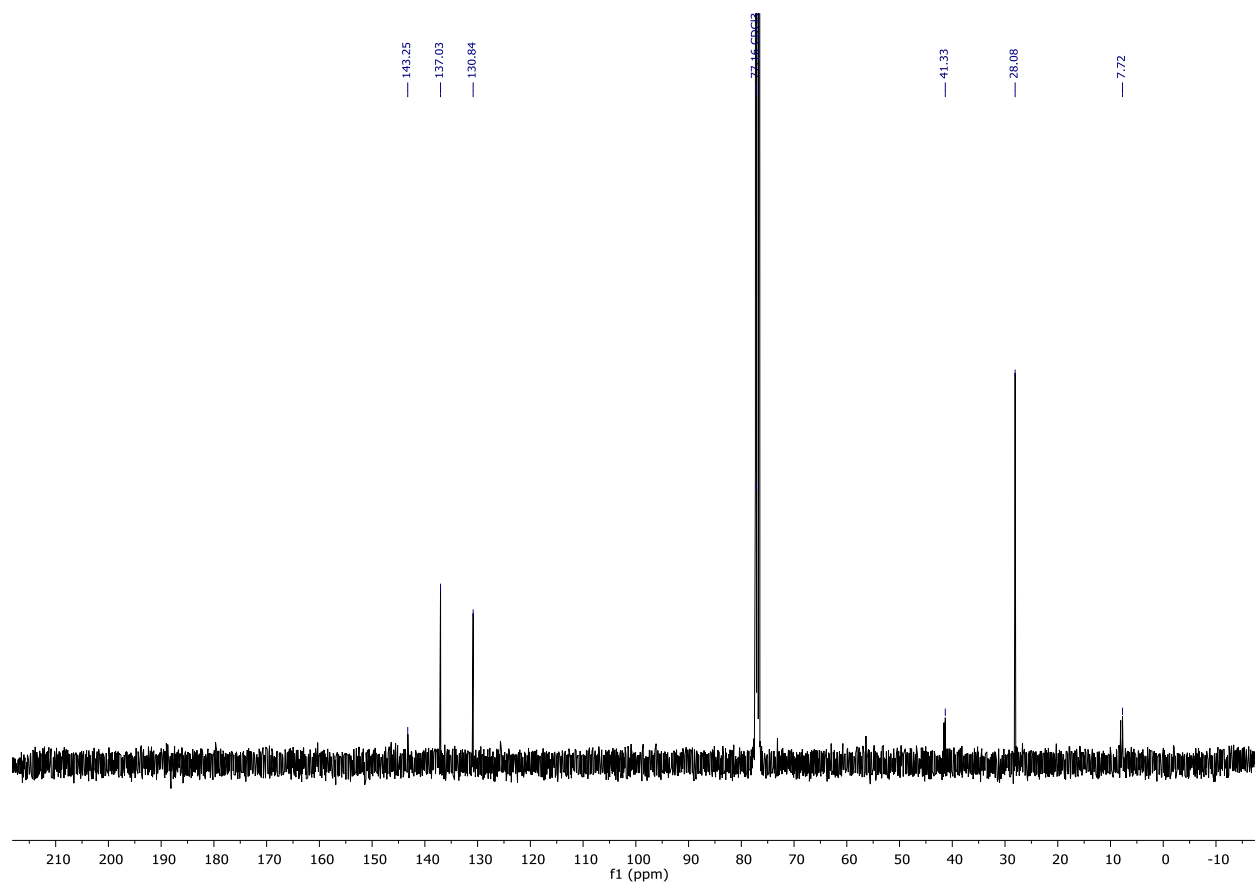

**Figure. S5**  $^{13}\text{C}$  NMR spectrum of **2** in  $\text{CDCl}_3$  at 298K.

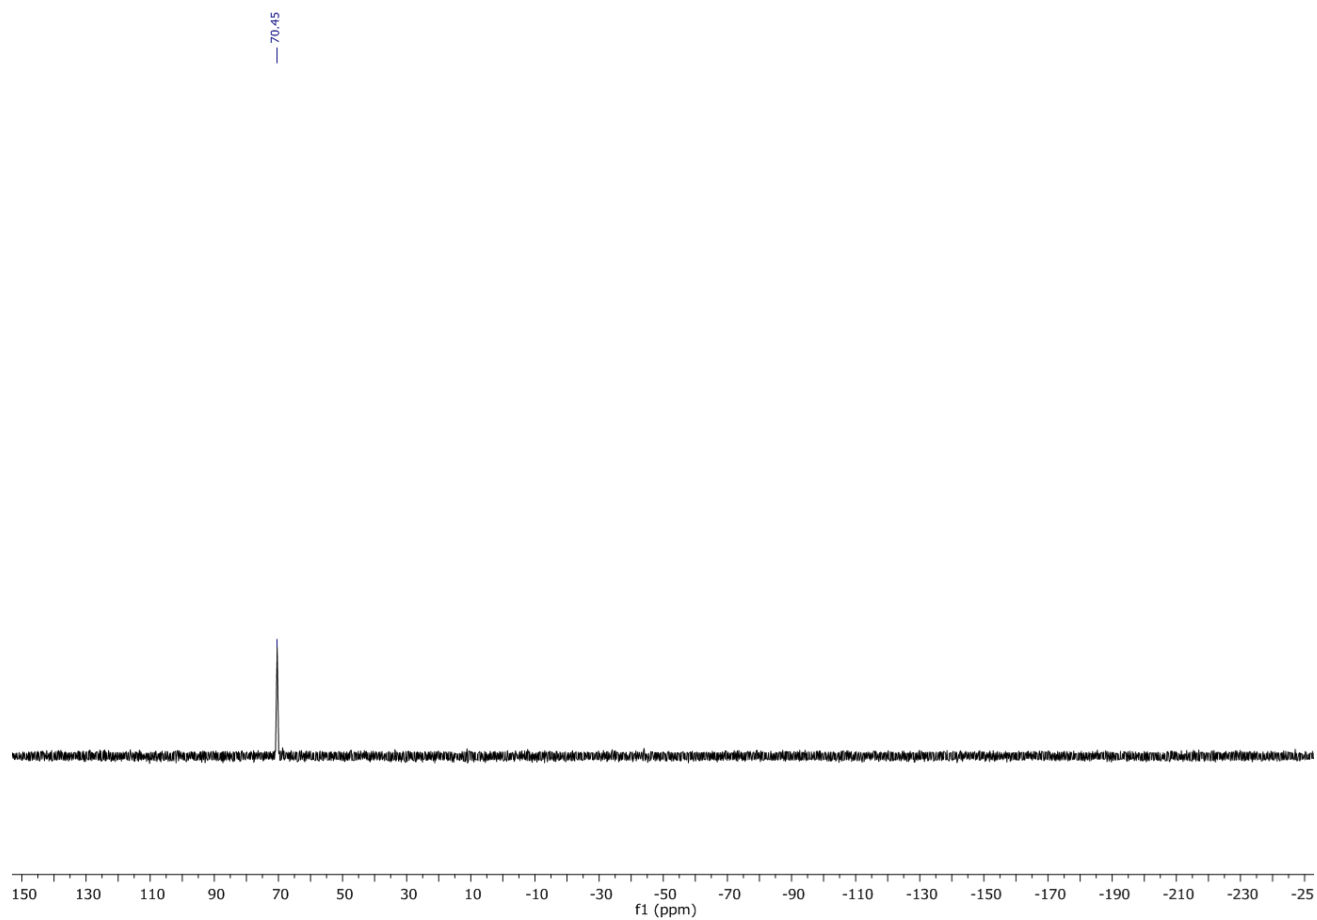

**Figure. S6**  $^{31}\text{P}$  NMR spectrum of **2** in  $\text{CDCl}_3$  at 298K.

## HRMS:

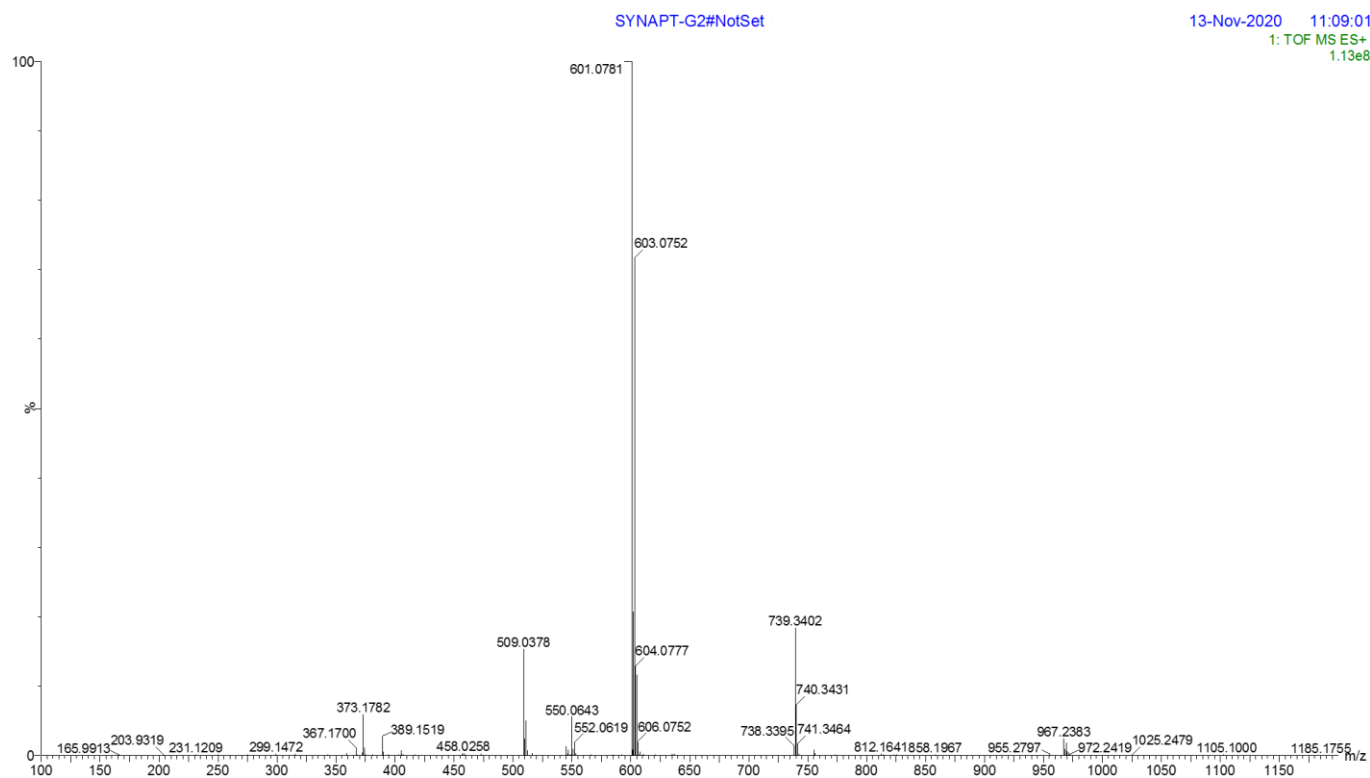

**Figure S7.** Full spectrum of HRMS of **1** – TOF MS ES<sup>+</sup>

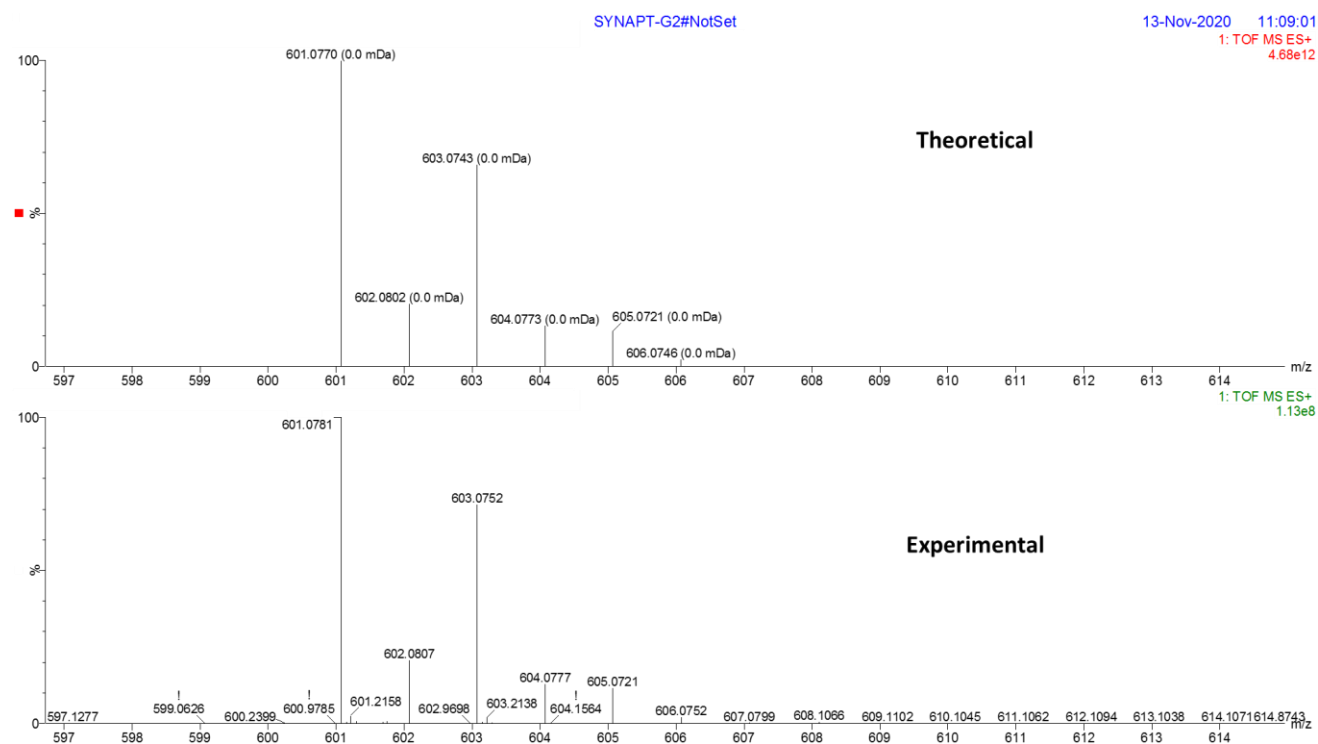



**Figure S8.** Experimental/Theoretical comparison of HRMS of **1** – TOF MS ES<sup>+</sup>

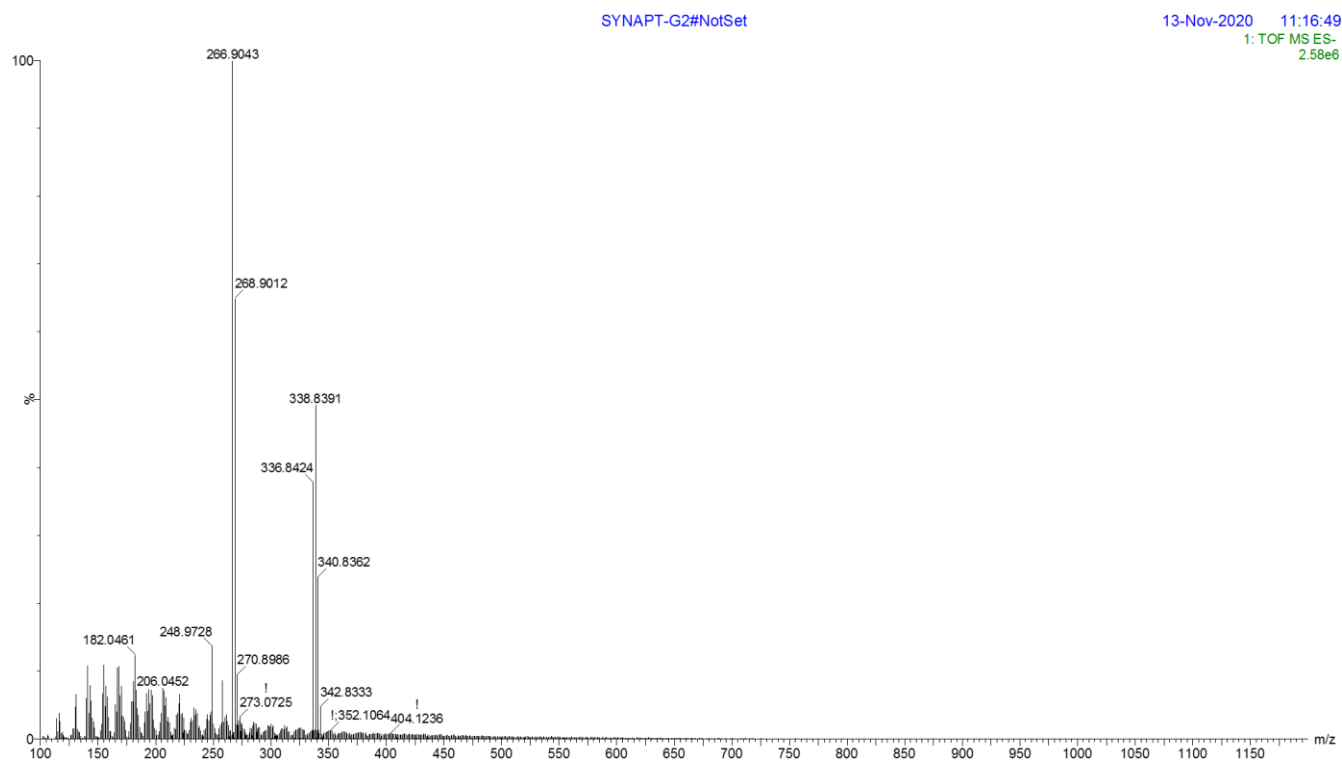

**Figure S9.** Full spectrum of HRMS of **1** - [AuCl<sub>4</sub>]<sup>-</sup> – TOF MS ES<sup>-</sup>

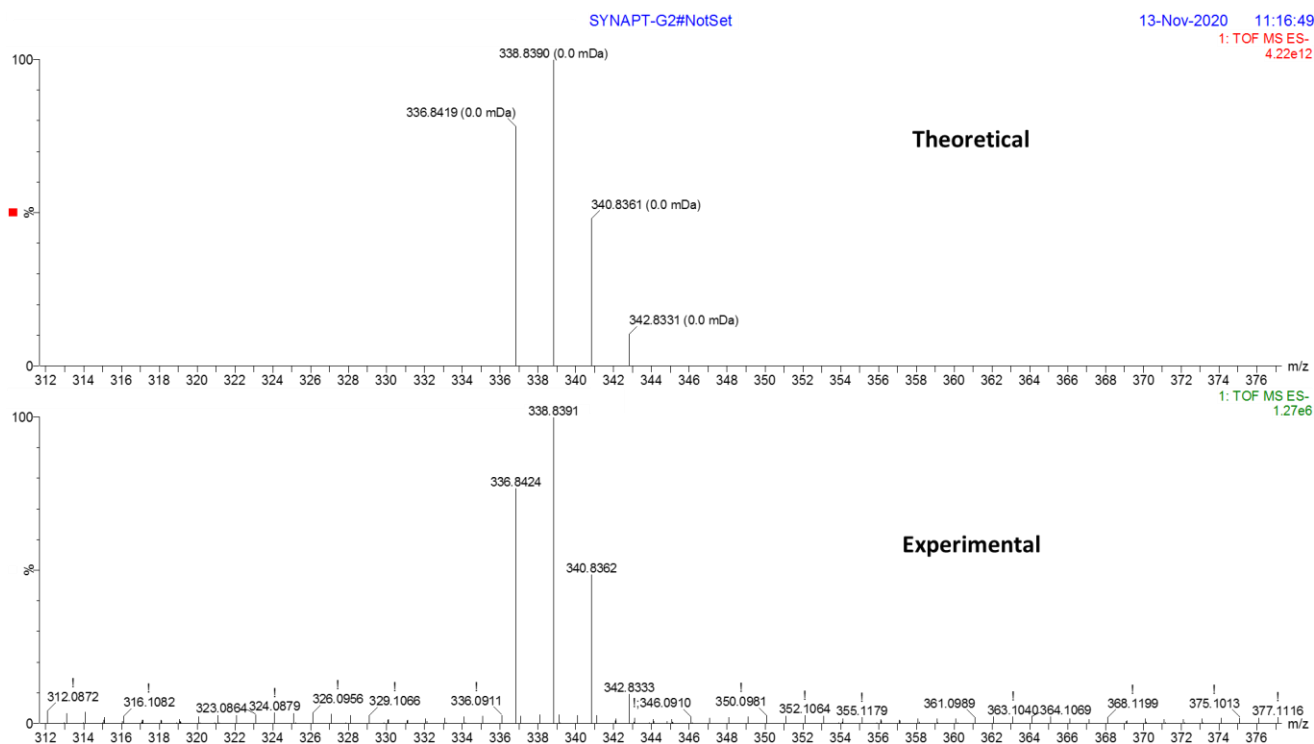

**Figure S10.** Experimental/Theoretical comparison of HRMS of **1** -  $[\text{AuCl}_4]^-$  – TOF MS ES<sup>-</sup>

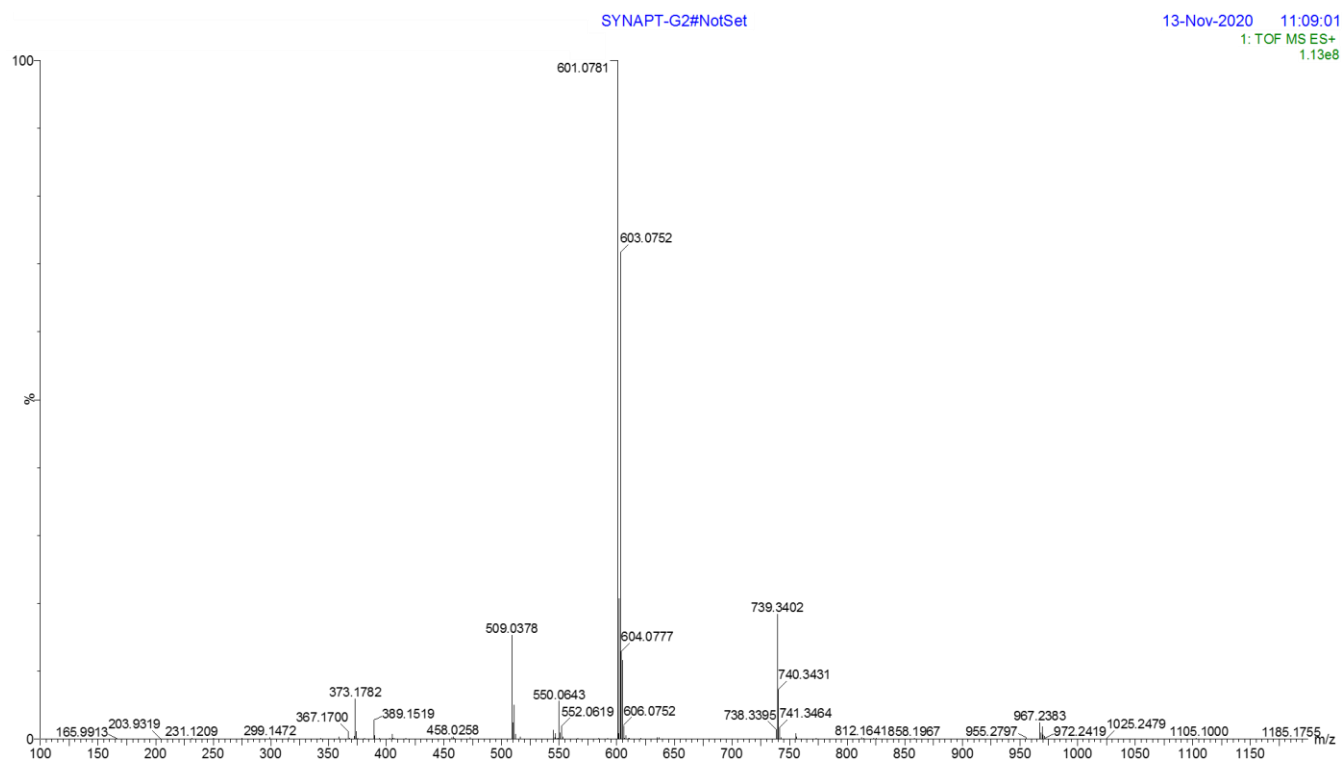

**Figure S11.** Full spectrum of HRMS of **2** – TOF MS ES<sup>+</sup>

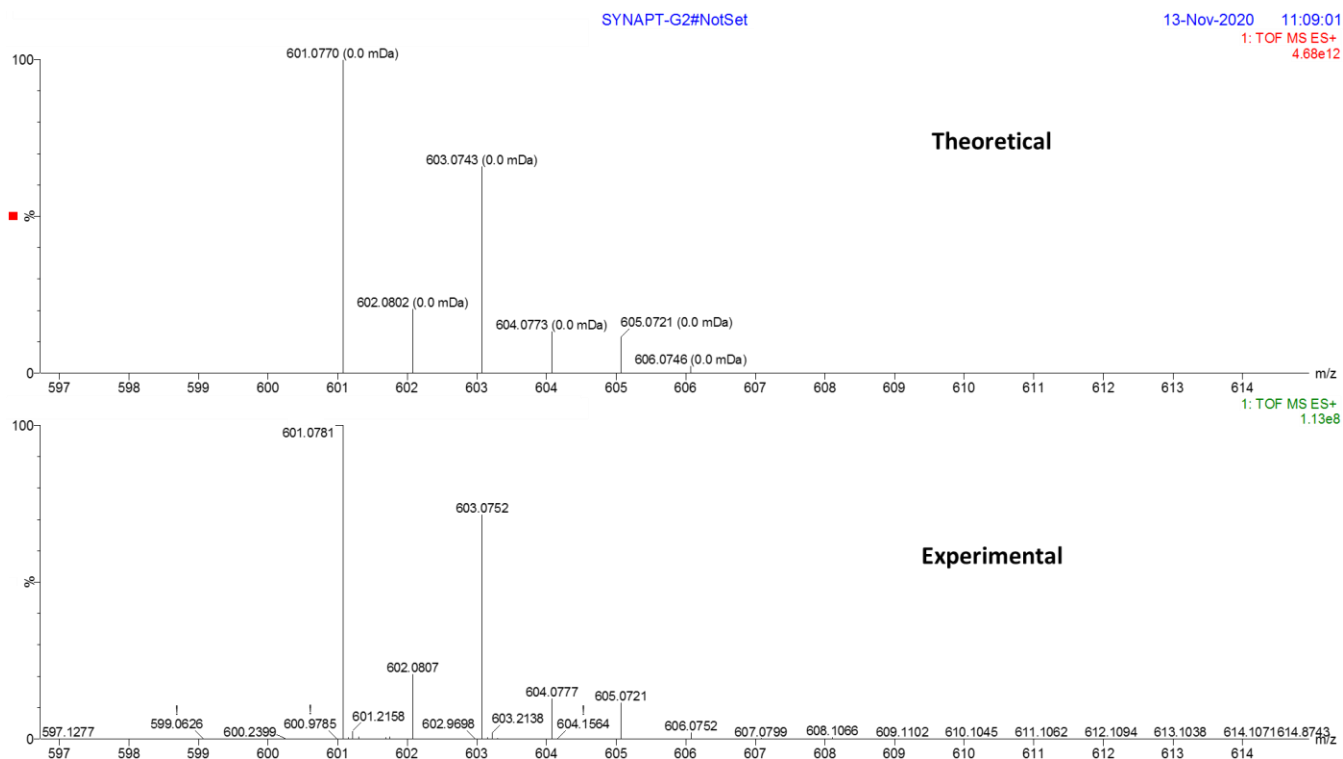

**Figure. S12** Experimental/Theoretical comparison of HRMS of **2** – TOF MS ES<sup>+</sup>

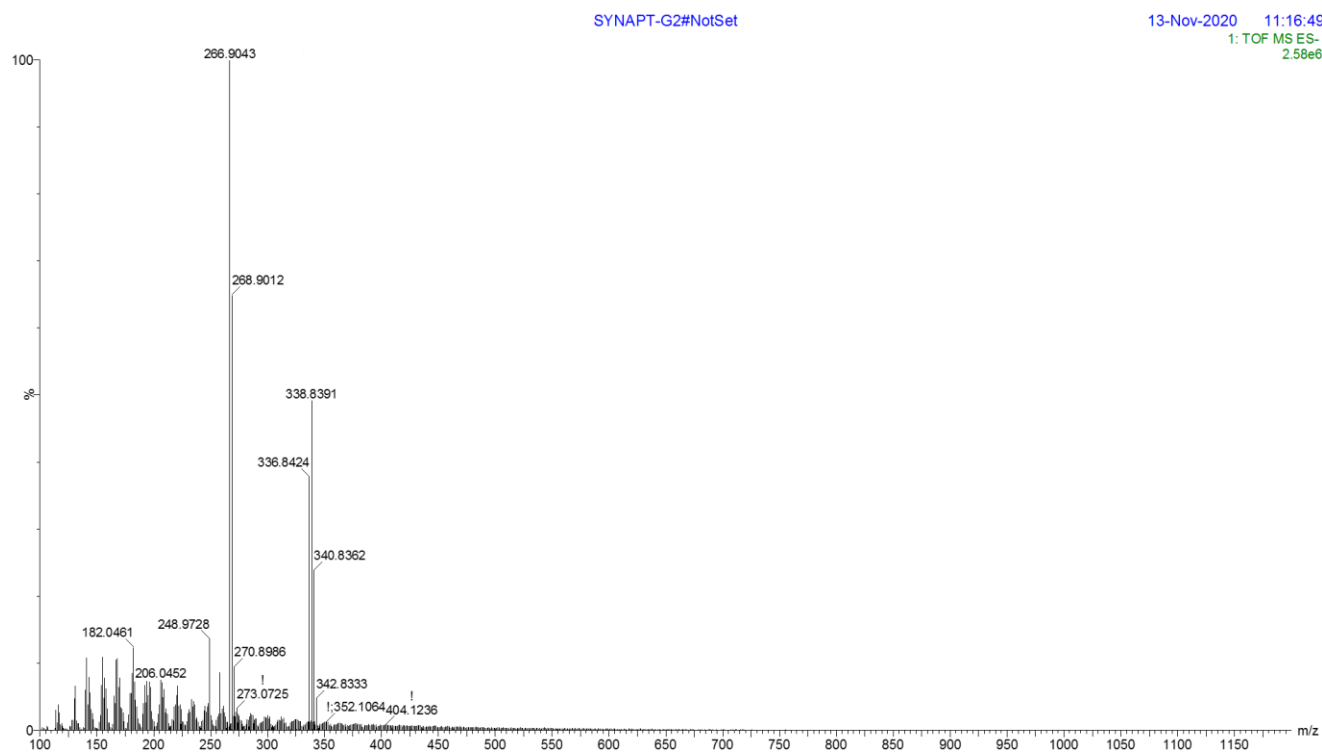

**Figure. S13** Full spectrum of HRMS of **2** - [AuCl<sub>4</sub>]<sup>-</sup> – TOF MS ES<sup>-</sup>

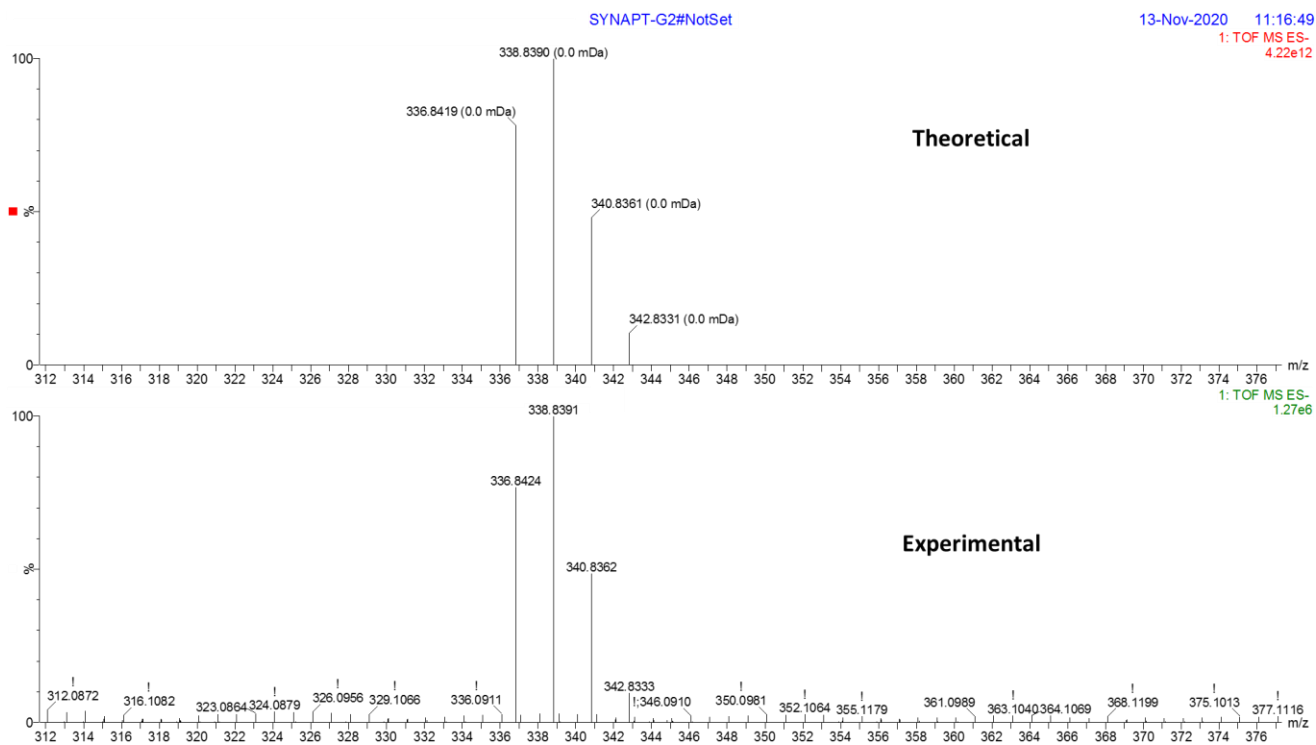

**Figure S14** Experimental/Theoretical comparison of HRMS of **2** - [AuCl<sub>4</sub>]<sup>-</sup> – TOF MS ES<sup>-</sup>

HPLC Trace:

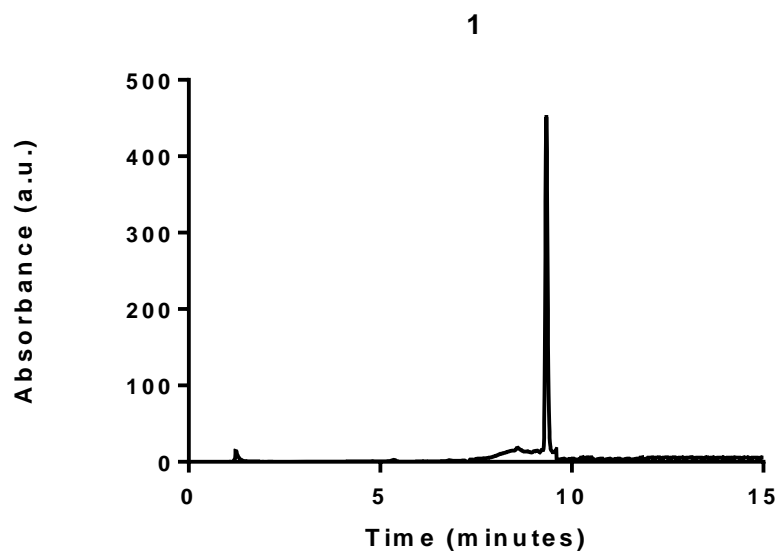

Figure S15 HPLC chromatogram of **1**, ( $\lambda = 280$  nm).

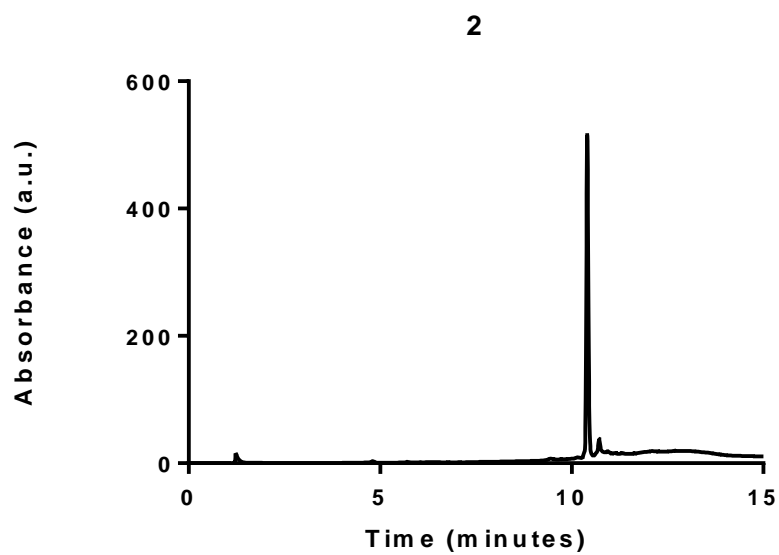

Figure S16. HPLC chromatogram of **2**, ( $\lambda = 280$  nm).

## Electrochemistry:

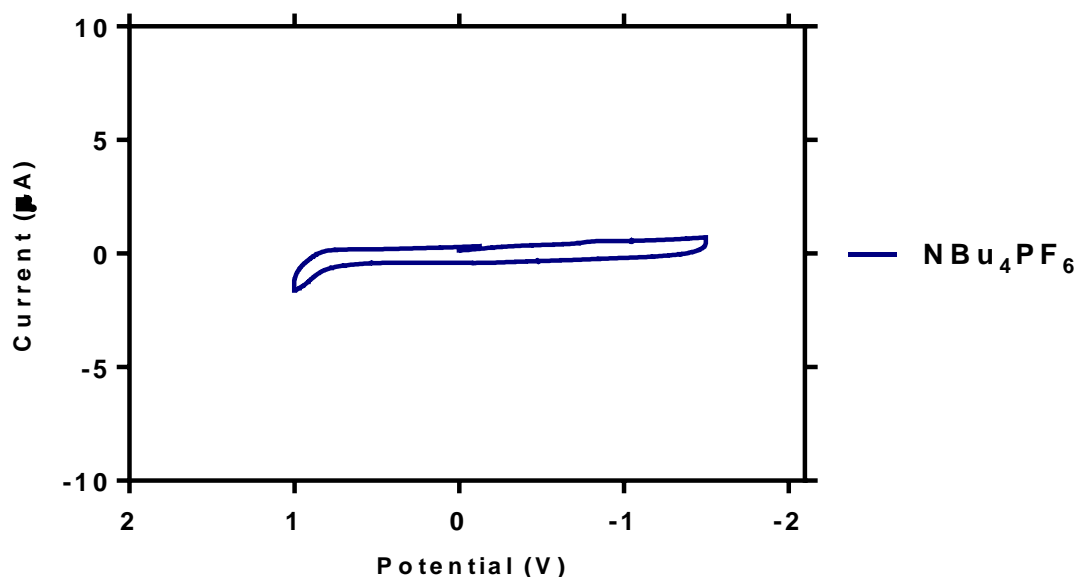

**Figure S17.** Cyclic voltammogram of the electrolyte ( $\text{NBu}_4\text{PF}_6$ ) performed at room temperature at 100 mV/s scan rate. The potential is referenced to Ag/AgCl.

**X-ray Accession Code:** CCDC 2044732 contain the supplementary crystallographic data for this paper. These data can be obtained free of charge via [www.ccdc.cam.ac.uk/data\\_request/cif](http://www.ccdc.cam.ac.uk/data_request/cif), or by emailing [data\\_request@ccdc.cam.ac.uk](mailto:data_request@ccdc.cam.ac.uk), or by contacting The Cambridge Crystallographic Data Centre, 12 Union Road, Cambridge CB2 1EZ, UK; fax: +44-1223-336033.
